# Supplementary material for: An ultrafast molecular rotor based ternary complex in a nanocavity: a potential “turn on” fluorescence sensor for the hydrocarbon chain
Source: Royal Society of Chemistry journal article supplement (doi:10.1039/c4cp04636f), 2015-01-01
Supplement: c4cp04636f1.pdf [file c4cp04636f1.pdf]

## Supporting Information

### Ultrafast molecular rotor based ternary complex in a nanocavity: A potential “turn on” fluorescence sensor for hydrocarbon chain

Sushant Murudkar,<sup>1</sup> Aruna K. Mora,<sup>1</sup> Prabhat K. Singh,<sup>1</sup> Tusar Bandyopadhyay,<sup>2</sup> and Sukhendu Nath<sup>1\*</sup>

<sup>1</sup>Radiation & Photochemistry Division, <sup>2</sup>Theoretical Chemistry Section, Bhabha Atomic Research Centre, Trombay, Mumbai 400 085, INDIA

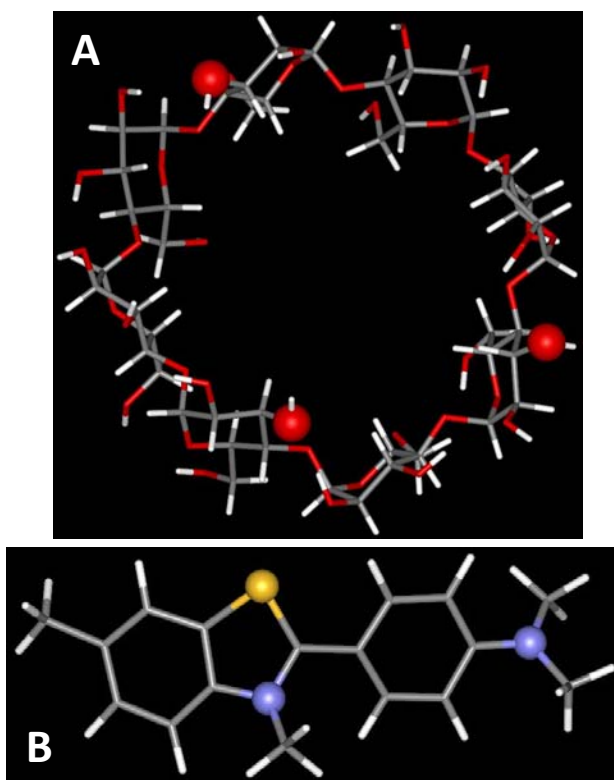

Figure 1S: Molecular structure of  $\gamma$ -CD (A) and ThT (B). Atoms which have been used to define the molecular plane (see main text) have been shown as balls.
